# Supplementary material for: Stratifin accelerates progression of lung adenocarcinoma at an early stage
Source: PubMed Central journal article supplement (PMC4518688; doi:10.1186/s12943-015-0414-1), 2015-07-30

# Additional Fig. 1

## A

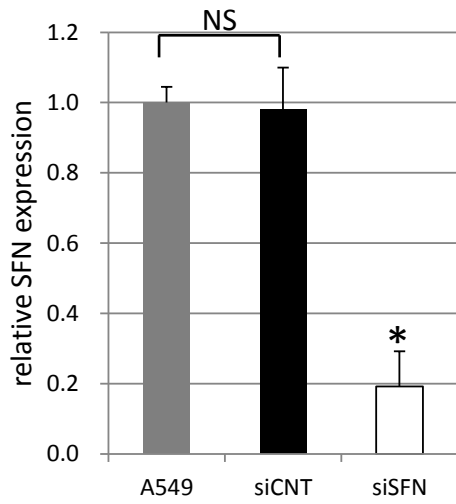

## B

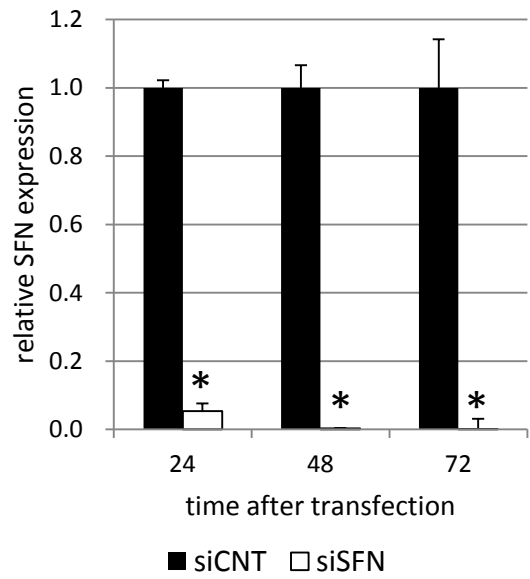

Supplement: 12943_2015_414_MOESM2_ESM.pdf [file 12943_2015_414_MOESM2_ESM.pdf]
