# Supplementary material for: Stratifin accelerates progression of lung adenocarcinoma at an early stage
Source: Springer Nature journal article supplement (doi:10.1186/s12943-015-0414-1), 2015-07-29

Additional Fig. 4

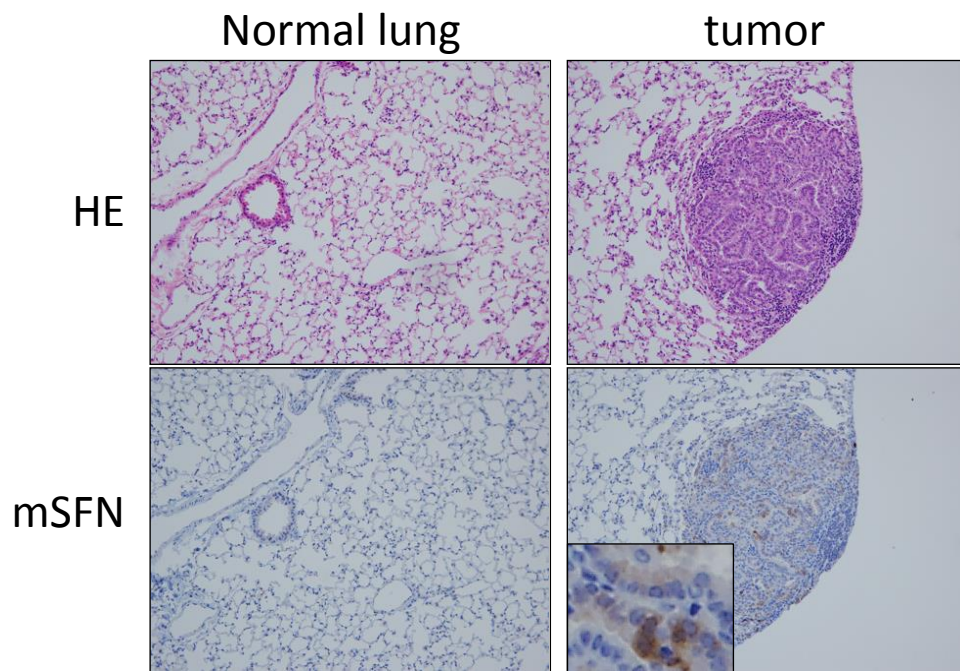

Supplement: MOESM5 [file 9763172]
